# Supplementary material for: Guest-induced formation of an icosahedral coordination cage
Source: Royal Society of Chemistry journal article supplement (doi:10.1039/b607512f), 2006-01-01
Supplement: b607512f.pdf [file b607512f.pdf]

## SUPPLEMENTARY INFORMATION

### Guest-Induced Formation of an Icosahedral Coordination Cage

*Thomas Brasey, Rosario Scopelliti, and Kay Severin*

**Synthesis of complex 3:** [(cymene)RuCl<sub>2</sub>]<sub>2</sub> (30.6 mg, 0.05 mmol), and AgNO<sub>3</sub> (34.0 mg, 0.20 mmol) were dissolved in acetone (2 ml) and stirred for 1 h at room temperature. After separation of the AgCl precipitate, the solvent was removed in vacuum and the oily residue was immediately re-dissolved in H<sub>2</sub>O (2 ml). Pyridine-3,5-dicarboxylic acid (16.7 mg, 0.10 mmol) was added and the mixture was stirred for 4 h at 60 °C. The yellow precipitate was collected by filtration, washed with H<sub>2</sub>O, and dried (yield 20.4 mg, 48%). Elemental analysis (%) calc. for C<sub>102</sub>H<sub>102</sub>N<sub>6</sub>O<sub>24</sub>Ru<sub>6</sub>·7H<sub>2</sub>O: C 48.45, H 4.62, N 3.32; found: C 48.07, H 4.71, N 3.76. MS-ESI: calc. for [M+H]<sup>+</sup> (*m/z*) 2403.4; found, 2403.2. Single crystals were grown by slow diffusion of diethyl ether in a solution of the product in methanol.

**<sup>1</sup>H NMR data for complex 3 (400 MHz, CD<sub>3</sub>OD):** δ (ppm) = 1.37 (d, <sup>3</sup>*J* = 7 Hz, 36 H, CH<sub>3</sub>, cymene), 1.93 (s, 18 H, CH<sub>3</sub>, cymene), 2.78 (sept, <sup>3</sup>*J* = 7 Hz, 6 H, CH, cymene), 5.86 (d, <sup>3</sup>*J* = 6 Hz, 12 H, CH, cymene), 6.16 (d, <sup>3</sup>*J* = 6 Hz, 12 H, CH, cymene), 8.40 (br, 6 H, CH, pyridine), 9.64 (br, 12 H, CH, pyridine).

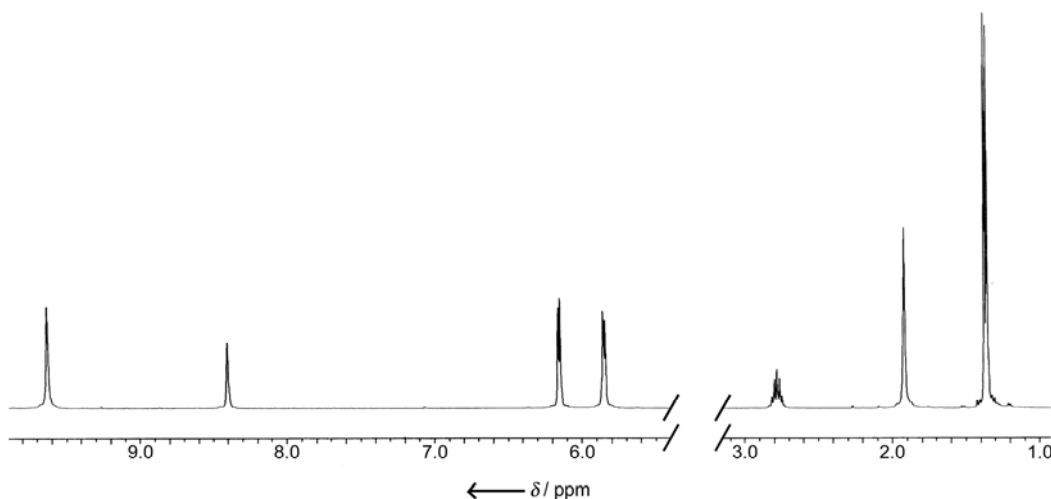

**Figure S1.** <sup>1</sup>H NMR spectrum of complex 3 in CD<sub>3</sub>OD.

**$^{13}\text{C}$  NMR data for complex 3 (101 MHz,  $\text{CD}_3\text{OD}$ ):**  $\delta$  (ppm) = 19.83 ( $\text{CH}_3$ , cymene), 24.68 ( $\text{CH}_3$ , cymene), 34.00 ( $\text{CH}$ , cymene), 81.68 ( $\text{CH}$ , cymene), 86.27 ( $\text{CH}$ , cymene), 100.76 ( $\text{C}$ , cymene), 104.87 ( $\text{C}$ , cymene), 136.36, 136.42, 141.40, 141.45 ( $\text{C}$  and  $\text{CH}$ , pyridine), 158.98 ( $\text{CH}$ , pyridine), 174.17 ( $\text{COO}$ ).

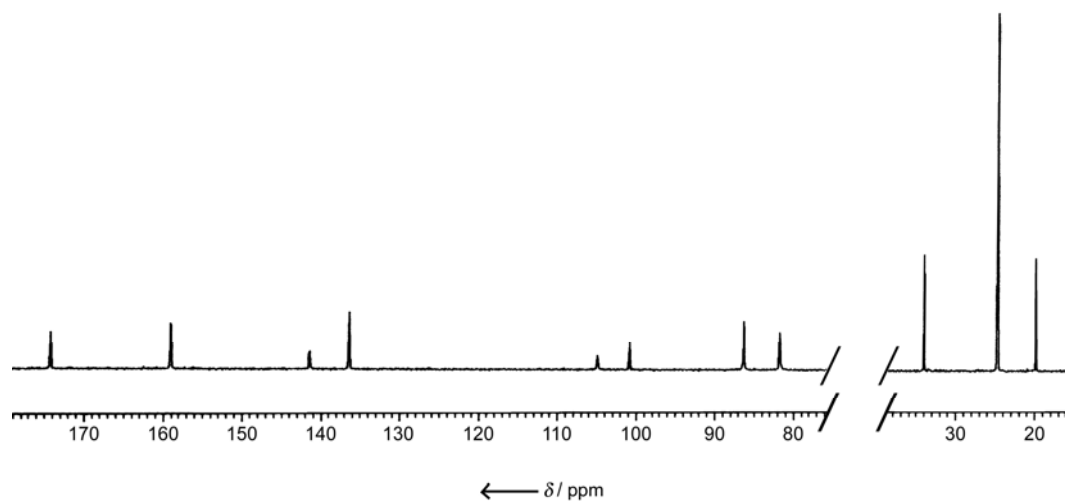

**Figure S2.**  $^{13}\text{C}$  NMR spectrum of complex 3 in  $\text{CD}_3\text{OD}$ .

**NMR experiments for the interaction of complex 3 with MOAc (M = Na, K, Cs):** 234  $\mu\text{l}$  of a stock solution of MOAc (320 mM) was added to a solution of complex 3 (18 mg, 7.5  $\mu\text{mol}$ ) in  $\text{CD}_3\text{OD}$  (366  $\mu\text{l}$ ). NMR spectra were recorded after an equilibration time of 30 minutes. Final concentrations:  $[\mathbf{3}] = 12.5$  mM,  $[\text{salt}] = 125$  mM. Experiments with different MOAc concentrations were performed accordingly.

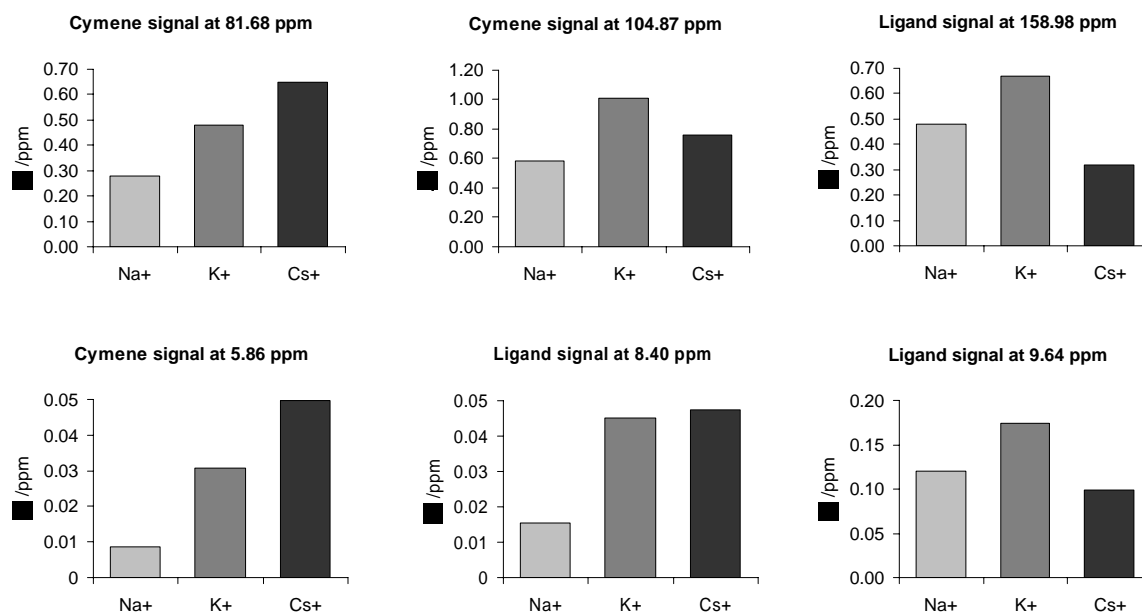

**Figure S4.** Differences of the chemical shifts of selected  $^{13}\text{C}$  (top) and  $^1\text{H}$  NMR signals (bottom) of complex 3 upon addition of 10 equivalents of MOAc.
